# Supplementary material for: Nanoassemblies from Amphiphilic Sb Complexes Target Infection Sites in Models of Visceral and Cutaneous Leishmaniases
Source: MDPI journal article supplement (doi:10.3390/pharmaceutics14081743), 2022-08-21
Supplement: s1 [file s1]

## Supplementary materials

**Nanoassemblies from amphiphilic Sb complexes target infection sites in models of visceral and cutaneous leishmaniases**, by Juliane S. Lanza, Virgínia M. R. Vallejos, Guilherme S. Ramos, Ana Carolina B. de Oliveira, Cynthia Demicheli, Luis Rivas, Sébastien Pomel, Philippe M. Loiseau and Frédéric Frézard

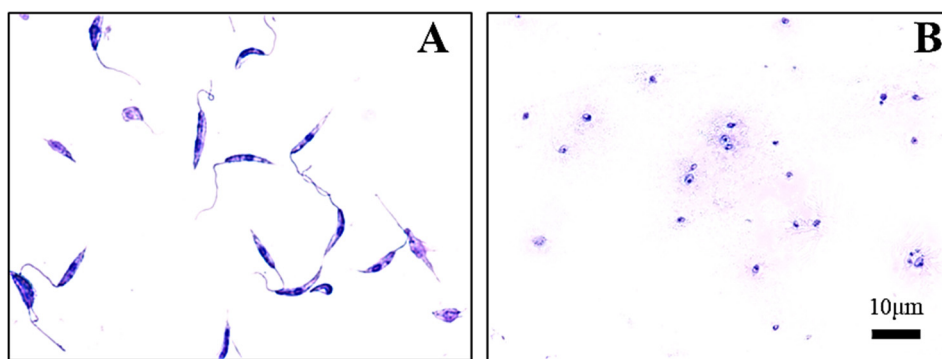

**Figure S1.** Photomicrographies of axenic *L. donovani* (LV9). In (A) promastigotes in log phase (4 days after initial inoculum of 200.000 parasites per mL of new medium) and (B) amastigote-like, transformed promastigotes, after 72 h incubation at 37 °C, 5% CO<sub>2</sub> atmosphere. Parasites were fixed with cold methanol (>99%) in pre-coated poly-lysine slides, air-dried and stained for 5 min with Giemsa stain.

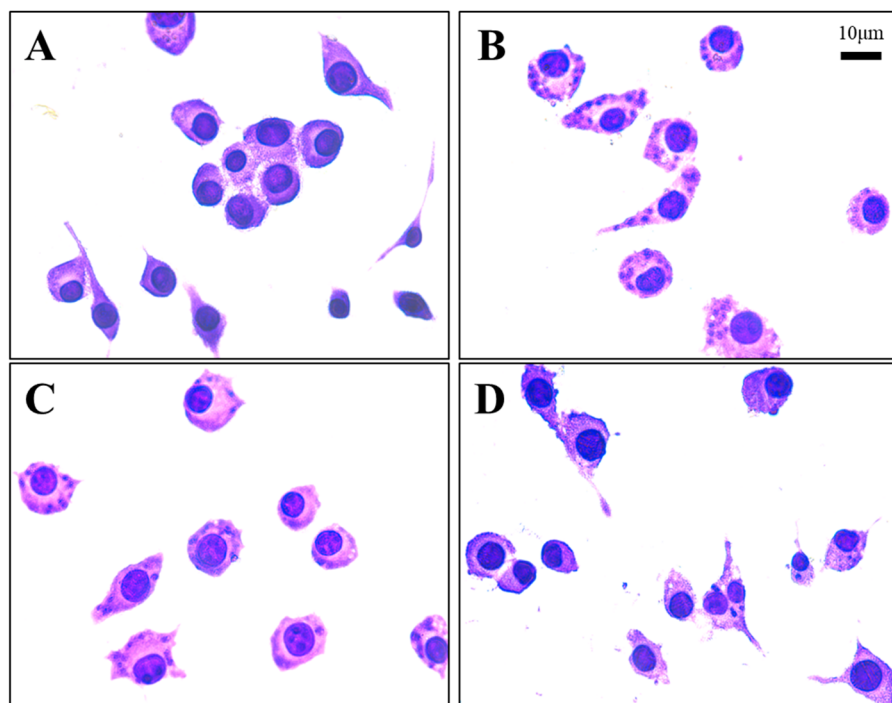

**Figure S2.** Antileishmanial efficacies of amphiphilic antimony complexes in *L. donovani*-infected RAW264.7 murine macrophages. (A) Represents the non-infected control, i.e., RAW264.7 incubated with complete RPMI medium 10% FCS; (B) Shows untreated infected macrophages, the rate of infection was higher then 80%; (C) Infected macrophages treated with 50 µM of SbL8 showed decrease of infection rate and parasite load per cell, and (D) Infected macrophages treated with 50µM of SbL10 showed very few infected cells with low numbers of amastigotes per infected cell.

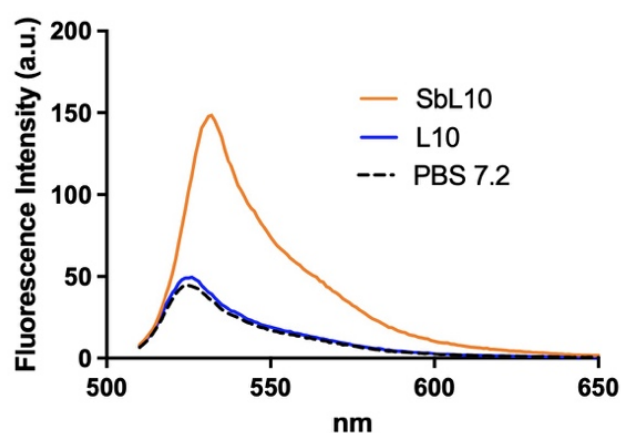

**Figure S3.** Fluorescence emission spectra of MT-11-BDP (miltefosine fluorescent analog) in saline, SbL10 and L10 suspensions at 1 mM of L10.

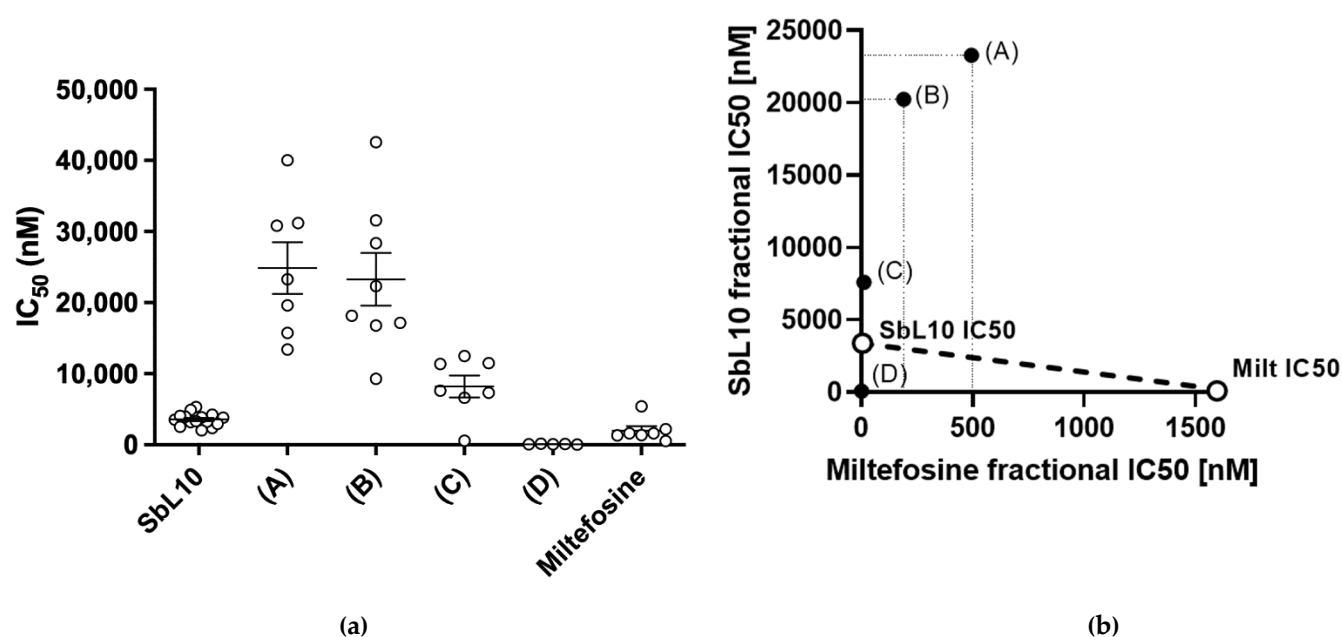

**Figure S4.** *In vitro* compound's activity interaction between SbL10 and miltefosine on intramacrophage *L. donovani* (LV9). (a): IC<sub>50</sub> of SbL10 alone, miltefosine alone and their combinations at different molar ratio (A–D); error bars indicate standard error of the mean (SEM). (b): fixed-ratio isobolograms of fractional drug IC<sub>50</sub> SbL10-miltefosine partner drug combination at different molar ratios. (A) = 0.8[miltefosine] + 0.2[SbL10]; (B) = 0.6[miltefosine] + 0.4[SbL10]; (C) = 0.4[miltefosine] + 0.6[SbL10]; (D) = 0.2[miltefosine] + 0.8[SbL10]).

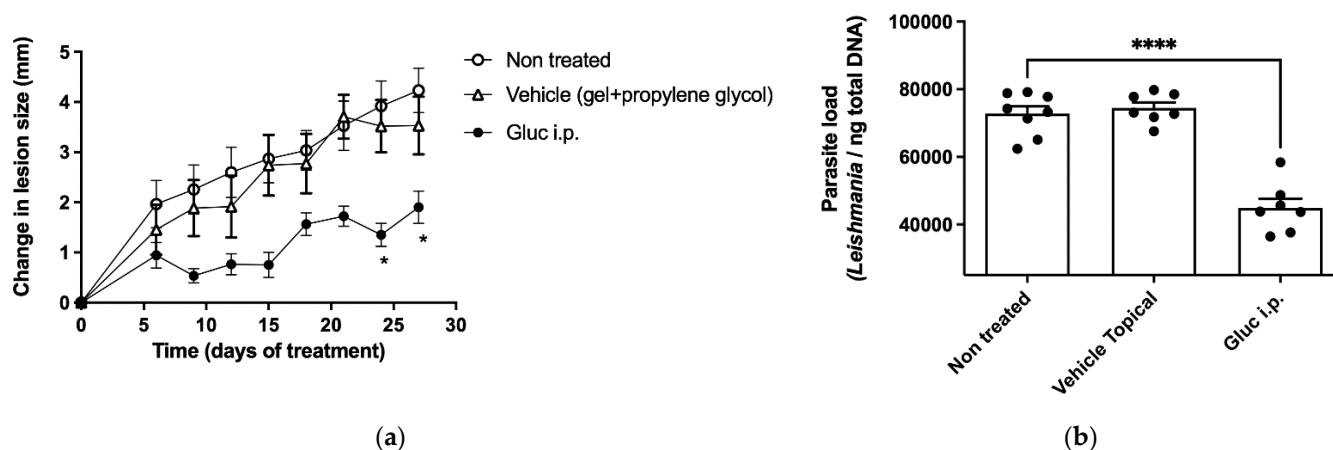

**Figure S5.** Antileishmanial efficacy in murine CL model of i.p. treatment with Glucantime®, in comparison to topical treatment with 1:1(v/v) water:PG gel and no treatment. BALB/c mice were infected intradermally at the tail base with  $1 \times 10^6$  *L. amazonensis* (MHOM/BR/1989/BA199). After 35 days of infection, animals ( $n = 7-8$  mice per group) were treated daily for 27 days with either 1:1(v/v) water:PG gel containing 1% (w/v) hydroxyethyl cellulose (50 uL/application) or Glucantime® by i.p. route at 200 mg/kg/day and compared to non-treated control group. (a) Variation of the lesion size with time shown as mean  $\pm$  SEM. \*  $p < 0.05$  with respect to control untreated group (Two-way repeated measures ANOVA, followed by Tukey's multiple comparisons test). (b) Parasite load as determined by qPCR at the end of treatment (30 days after the start of treatment). \*\*\*\*  $p < 0.0001$  for comparison of each treated group with the control group, one-way ANOVA test, followed by Dunnett's multiple comparison post-test. Data are shown as mean + SEM.

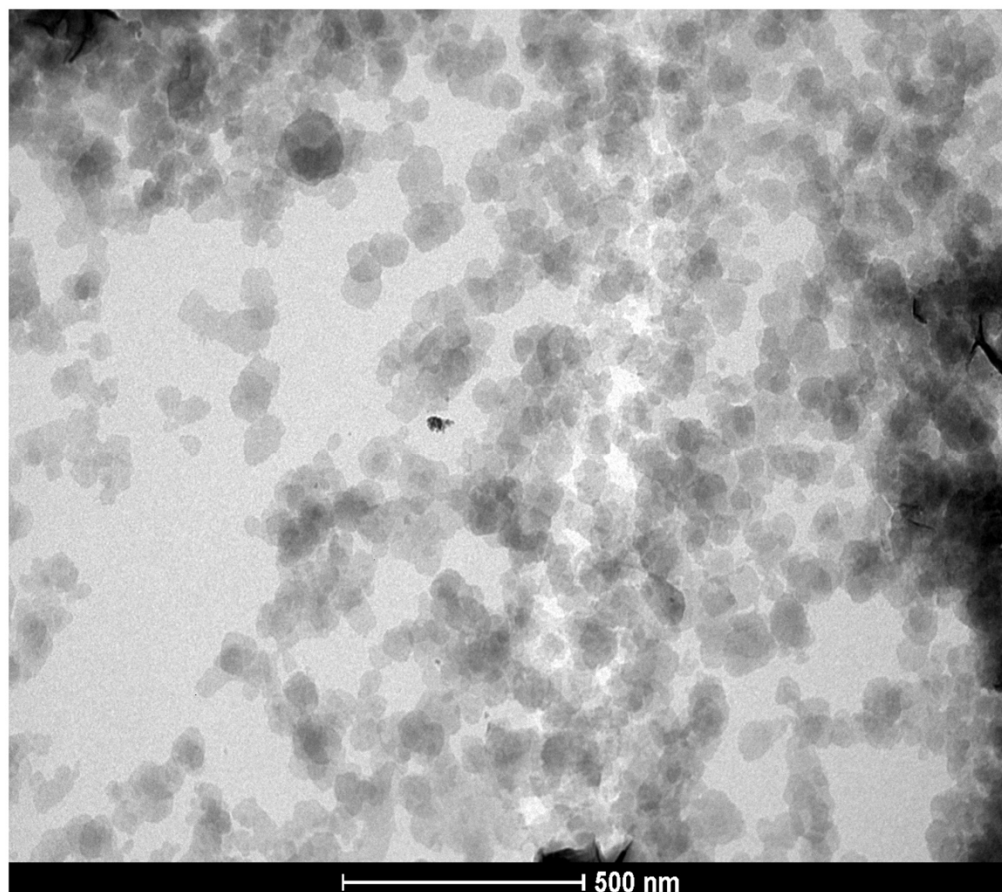

**Figure S6:** Characterization of the morphology of SbL8 nanoassemblies in PBS 7.2 by transmission electron microscopy.

**Table S1.** Particle size distribution and zeta potential of nanoparticles in SbL8 and SbL10 suspensions in NaCl 0.15 M (pH 5.5) or HCl 0.05 M.

| Sample      | Mean hydrodynamic diameter (nm) | Polydispersity index | Zeta potential (mV) |
|-------------|---------------------------------|----------------------|---------------------|
| SbL8        | 93.9                            | 0.281                | -27.8               |
| SbL8 + HCl  | *                               | -                    | -18                 |
| SbL10       | 36.3                            | 0.591                | -29.1               |
| SbL10 + HCl | *                               | -                    | -16.8               |

\* high polydispersity

**Table S2.** Individual ( $IC_{50}$ ) and fractional ( $\Sigma FIC$ ) drug inhibitory concentration for the pharmacological interactions between miltefosine and SbL10 towards intracellular *L. donovani* amastigotes, according to modified chequerboard assay

| Association<br>(Milt:SbL10<br>molar ratio) | $IC_{50} \pm SD^a$<br>of SbL10 (nM) | $IC_{50} \pm SD^a$<br>of miltefosine (nM) | $\Sigma FIC$ | Interpretation<br><sup>b</sup> |
|--------------------------------------------|-------------------------------------|-------------------------------------------|--------------|--------------------------------|
| -                                          | 3242±900                            | 1621±160                                  |              |                                |
| A (4:1)                                    | 23285±9500                          | 49.3±30                                   | 7.4863       | Antagonism                     |
| B (3:2)                                    | 20232±10500                         | 18.9±10                                   | 6.35759      | Antagonism                     |
| C (2:3)                                    | 7592±410                            | 11.9±0.6                                  | 2.34908      | Additive                       |
| D (1:4)                                    | 76.5±40                             | 0.3±0.02                                  | 0.0238       | Synergism                      |

<sup>a</sup> $IC_{50}$  values are expressed in mean inhibitory concentration of 50% infection index (regarding the non-treated control)  $\pm$  standard deviation. <sup>b</sup> $\Sigma FIC \leq 0.5$ , synergism;  $\Sigma FIC > 0.5-4.0$ , no interaction (or additive);  $\Sigma FIC > 4.0$ , antagonism [15,20,31].

**Table S3.** Intracellular accumulation of Sb ( $\mu g$  Sb /  $10^6$  Thp-1 cells) (data from Figure 3a).

| Drug | SbL8    | SbL10    | Gluc     |
|------|---------|----------|----------|
|      | 0.1978  | 0.19925  | 0.01055  |
|      | 0.2635  | 0.21495  | 0.014    |
|      | 0.11995 | 1.33055* | 0.00015  |
|      | 0.19445 | 0.1954   | -0.00175 |
|      | 0.203   | 0.1938   | 0.01545  |
|      | 0.19875 | 0.16575  | 0.1716*  |
|      | 0.18005 | 0.187    |          |
|      | 0.16795 | 0.15975  |          |
|      | 0.2497  | 0.1645   |          |

\* values identified as outliers according to ROUT (Q = 0.1%) and removed for statistical analysis.

**Table S4.** Accumulation of Sb in the liver of mice ( $\mu\text{g Sb / g wet tissue}$ ) 24 h after administration of different antimonial formulations (data from Figure 3b).

| <b>SbL8 i.p.</b> | <b>SbL10 i.p.</b> | <b>Gluc i.p.</b> | <b>SbL8 Oral</b> | <b>SbL10 Oral</b> |
|------------------|-------------------|------------------|------------------|-------------------|
| 84.4677661       | 69.0254873        | 8.09595202       | 13.5832084       | 62.9835082        |
| 183.208396       | 100.269865        | 8.54572714       | 14.197901        | 61.4242879        |
| 111.514243       | 74.9325337        | 8.54572714       | 11.0794603       | 15.2623688        |
| 106.086957       | 64.1529235        | 9.44527736       | 27.9610195       | 10.6446777        |
| 100.734633       | 99.1154423        | 4.7976012        | 10.1949025       | 42.113943         |

**Table S5.** Parasite load in the liver of mice infected with *L. donovani* after different antimonial treatments (data from Figure 5a)

| <b>Parasite load (<i>Leishmania</i> number per 50 ng of DNA)</b> |                  |                  |                   |                  |                   |
|------------------------------------------------------------------|------------------|------------------|-------------------|------------------|-------------------|
| <b>Non-treated</b>                                               | <b>Gluc i.p.</b> | <b>SbL8 Oral</b> | <b>SbL10 Oral</b> | <b>SbL8 i.p.</b> | <b>SbL10 i.p.</b> |
| 12.2                                                             | 0.00545          | 6.1              | 0.427             | 0.222*           | 2.54*             |
| 14.3                                                             | 0.0263           | 14.9             | 0.816             | 0.0139           | 0.00584           |
| 7.35                                                             | 0.0166           | 3.18             | 0.386             | 0.0144           | 0.0124            |
| 106                                                              | 0.00522          | 0.772            | 0.52              | 0.0449           | 0.01              |
| 76.8                                                             | 0.00756          | 0.172            | 1.72              | 0.0224           | 0.03              |
| 15.5                                                             | 0.00886          | 3.5              | 8.64*             | 0.0102           | 0.02              |
| 37.2                                                             | 0.00376          |                  |                   |                  |                   |
| 28.8                                                             | 0.0269           |                  |                   |                  |                   |
| 23.3                                                             | 0.00766          |                  |                   |                  |                   |

\*values identified as outliers according to ROUT (Q = 0.1%) and removed for statistical analysis.

**Table S6.** Parasite load in the spleen of mice infected with *L. donovani* after different antimonial treatments (data from Figure 5b)

| Parasite load ( <i>Leishmania</i> number per 50 ng of DNA) |           |           |            |           |            |
|------------------------------------------------------------|-----------|-----------|------------|-----------|------------|
| Non-treated                                                | Gluc i.p. | SbL8 Oral | SbL10 Oral | SbL8 i.p. | SbL10 i.p. |
| 7.77                                                       | 2.51      | 2.26      | 2.76       | 1.05      | 0.908      |
| 4.97                                                       | 1.04      | 2.31      | 2.31       | 0.661     | 0.477      |
| 1.35                                                       | 0.386     | 2.39      | 1.19       | 0.525     | 0.351      |
| 3.31                                                       | 1.52      | 2.94      | 2.43       | 0.686     | 0.587      |
| 4.08                                                       | 0.635     | 2.65      | 3.77       | 0.638     | 0.641      |
| 3.75                                                       | 0.676     | 2.31      | 2.25       | 0.254     | 0.747      |
| 3.87                                                       | 0.689     |           |            |           |            |
| 5.44                                                       | 0.661     |           |            |           |            |
| 1.42                                                       | 0.519     |           |            |           |            |

**Table S7.** Variation of lesion size of mice infected with *L. amazonensis* after different antimonial treatments (data from Figure 6a)

| Variation of lesion size with respect to time zero (mm) |      |      |      |      |      |      |
|---------------------------------------------------------|------|------|------|------|------|------|
| Non-treated                                             |      |      |      |      |      |      |
| Time (day)                                              |      |      |      |      |      |      |
| 5                                                       | 0.2  | 0.1  | 0.3  | 0.3  | 0.3  | 0.3  |
| 10                                                      | 0.9  | 0.85 | 0.85 | 1.75 | 0.7  | 1.2  |
| 15                                                      | 1.05 | 0.4  | 1.15 | 2.65 | 1.1  | 1.8  |
| 20                                                      | 1.75 | 1.7  | 2.1  | 3.3  | 2.6  | 2.7  |
| 25                                                      | 3.3  | 2.45 | 3.4  | 4.3  | 2.95 | 3.9  |
| 30                                                      | 4.5  | 4.7  | 4.45 | 4.9  | 4.5  | 4.95 |
| Gluc i.p.                                               |      |      |      |      |      |      |
| Time (day)                                              |      |      |      |      |      |      |
| 5                                                       | 0.3  | 0.2  | 0.1  | 0.1  | 0.2  | 0.25 |
| 10                                                      | 0.15 | -0.4 | 0.2  | 0.8  | 0.35 | 0.25 |
| 15                                                      | 0.5  | 0.25 | 0.3  | 1.1  | 0.85 | 0.35 |

|               |      |      |       |      |      |      |
|---------------|------|------|-------|------|------|------|
|               |      |      |       |      |      |      |
| 20            | 0.95 | 0.7  | 0.65  | 2.05 | 1.95 | 0.9  |
| 25            | 1.75 | 1.35 | 1.55  | 4.95 | 3.65 | 1.05 |
| 30            | 1.7  | 1.9  | 1.7   | 5    | 4.5  | 1.9  |
| Gluc Topical  |      |      |       |      |      |      |
| Time (day)    |      |      |       |      |      |      |
| 5             | 0.05 | 0.18 | 0.25  | 0.2  | 0    | 0.2  |
| 10            | 0.55 | 0.88 | -0.05 | 0.45 | -0.6 | 0.95 |
| 15            | 0.55 | 1.33 | 0.7   | 0.55 | -0.2 | 1.4  |
| 20            | 2    | 2.58 | 1.2   | 1.05 | 1.15 | 2    |
| 25            | 3.3  | 4.08 | 2.05  | 2.35 | 2.45 | 2.85 |
| 30            | 3.85 | 5.88 | 3     | 3.5  | 4.1  | 4.5  |
| SbL8 Topical  |      |      |       |      |      |      |
| Time (day)    |      |      |       |      |      |      |
| 5             | 0.2  | 0.3  | 0.2   | 0.1  | 0.1  | 0.3  |
| 10            | 1.15 | 0.4  | 0.85  | 0.9  | 0.25 | 1.1  |
| 15            | 1.65 | 0.95 | 1.3   | 1.55 | 0.6  | 1    |
| 20            | 2.35 | 1.7  | 1.95  | 2.05 | 0.95 | 1.45 |
| 25            | 3.7  | 3.2  | 4.05  | 3.65 | 2.5  | 3.25 |
| 30            | 4.4  | 4.45 | 4.3   | 5.35 | 3.7  | 4.2  |
| SbL10 Topical |      |      |       |      |      |      |
| Time (day)    |      |      |       |      |      |      |
| 5             | 0.1  | 0    | 0.2   | 0    | 0    | 0.1  |
| 10            | 0    | 0.7  | 0     | 0.6  | 0.95 | 0.75 |
| 15            | 0.6  | 1.15 | 0.95  | 0.75 | 1.05 | 1.25 |
| 20            | 0.8  | 1.95 | 1.85  | 1.65 | 2.15 | 2    |
| 25            | 1.25 | 3    | 2.6   | 2.5  | 3.3  | 4.2  |
| 30            | 2.65 | 3.45 | 3     | 3    | 4.1  | 3.9  |

**Table S8.** Parasite load in the lesion of mice infected with *L. amazonensis* after different antimonial treatments (data from Figure 6b)

| <b>Parasite load in the lesion (<i>Leishmania</i> number per ng of DNA)</b> |           |              |              |               |            |
|-----------------------------------------------------------------------------|-----------|--------------|--------------|---------------|------------|
| Non-treated                                                                 | Gluc i.p. | Gluc Topical | SbL8 Topical | SbL10 Topical | SbL10 Oral |
| 1155479                                                                     | 175071.7  | 359569.9     | 494000.2     | 479369.6      | 329230.6   |
| 561869.6                                                                    | 373043.3  | 155469.4     | 95670.99     | 319384.4      | 203775.1   |
| 642463.7                                                                    | 574903.3  | 326885.2     | 369928.9     | 507747.5      | 555340.2   |
| 809993.8                                                                    | 636389.8  | 346152.2     | 346190.6     | 666097.5      | 418953.1   |
| 418729.7                                                                    | 247976.8  | 608855.7     | 386653.4     | 504101.8      | 217939.3   |
| 440610.9                                                                    | 448612    | 640522.6     | 211344.3     | 275635.9      | 463645.2   |
